# Supplementary material for: pH Changes in the Micelle–Water Interface of Surface-Active Ionic Liquids Dictate the Stability of Encapsulated Curcumin: An Insight Through a Unique Interfacial Reaction between Arenediazonium Ions and t-Butyl Hydroquinone
Source: PubMed Central journal article supplement — ACS Omega. 2021 Jun 3;6(23):14985–5000. doi: 10.1021/acsomega.1c01119 (PMC8209824; doi:10.1021/acsomega.1c01119), 2021-06-03
Supplement: ao1c01119_si_001.pdf [file ao1c01119_si_001.pdf]

## Supporting Information

### pH changes in the micelle-water interface of surface-active ionic liquids dictate the stability of encapsulated curcumin: An insight through a unique interfacial reaction between arenediazonium ion and *t*-butyl hydroquinone

Saima Afzal,<sup>a</sup> Mohd Sajid Lone,<sup>a</sup> Nighat Nazir,<sup>b</sup> Aijaz Ahmad Dar,<sup>\*a</sup>

<sup>a</sup>Soft Matter Research Group, Department of Chemistry, University of Kashmir, Hazratbal, Srinagar-190006, J&K, India. Email: aijaz\_n5@yahoo.co.in; aijazdar@kashmiruniversity.ac.in

<sup>b</sup>Department of Chemistry, Islamia College of Science and Commerce, Hawal, Srinagar-190002, J&K, India.

#### FT-IR of SAILs:

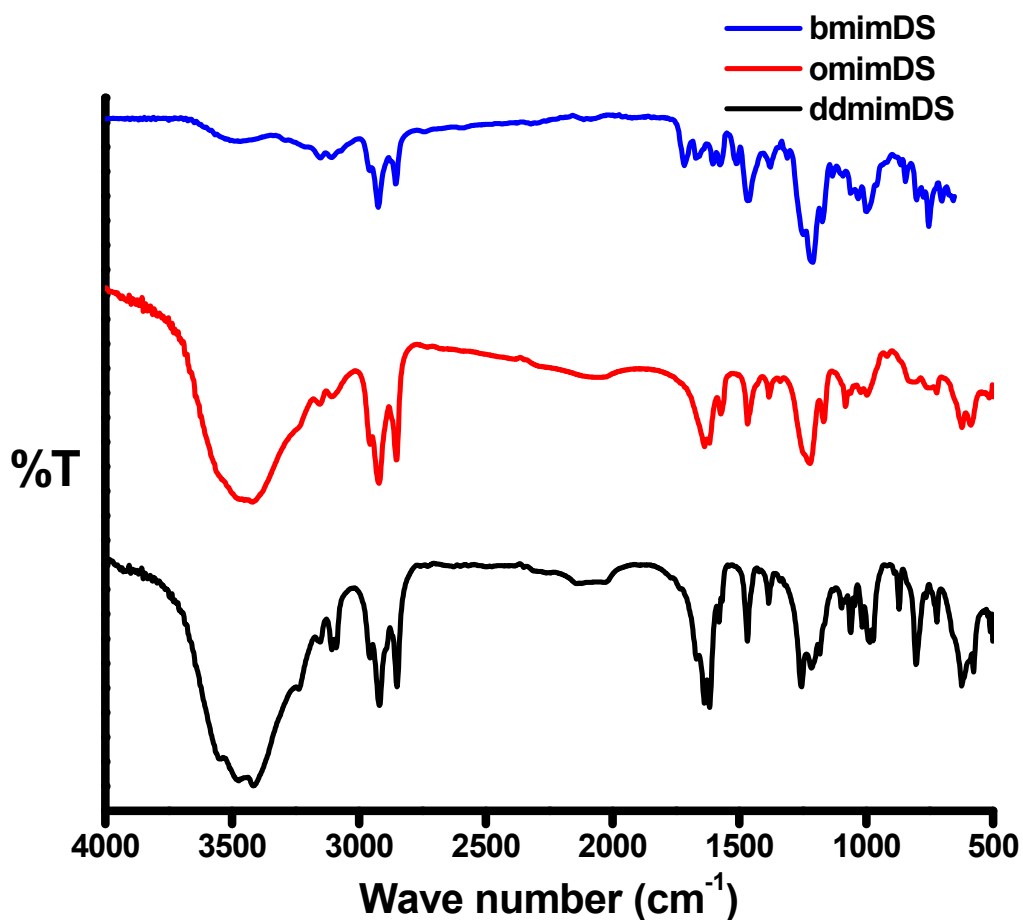

Figure S1. FT-IR spectra of bmimDS, omimDS and ddmimDS

Spectral data of SAILs is given as below:

**FT-IR (cm<sup>-1</sup>) bmimDS:** 3466 (N-H s), 2855 (C-H s), 1669 (C=C s), 1607 (C=N s), 1207 (S-O s)

**FT-IR (cm<sup>-1</sup>) omimDS:** 3417.8 (N-H s), 2850.7 (C-H s), 1637.1 (C=C s), 1619.1 (C=N s), 1222.2 (S-O s)

**FT-IR (cm<sup>-1</sup>) ddmimDS:** 3417.6 (N-H s), 2850.0 (C-H s), 1637.8 (C=C s), 1618.1 (C=N s), 1216.2 (S-O s).

**Absorbance Data with Time shows the Biexponential kinetics and not monoexponential kinetics.**

The typical kinetic plots showing the decrease in absorbance of the probe during its reduction by TBHQ at different concentrations in 3 mM OmimDS as prototype at pH 5.5 is represented in figure 2Sa. The kinetic data fitted very well to the biexponential decay equation 9 of the manuscript. The monoexponential fit shows the R-Square value of 0.988 which is very low for such a large number of experimental points. However, biexponential fit shows R-Square value of 0.999 which is statistically very well accepted for such a large number of data points. The adjacent figure (Figure 2Sb) shows the plot of  $\log((A_t - A_\infty)/(A_0 - A_\infty))$  vs time where  $A_0$ ,  $A_\infty$  and  $A_t$  are absorbance values at zero time, at infinity and at time  $t$  in first plot. This data should fit a straight line if it follows the monoexponential equation. As clearly seen, there is a deviation from the straight line indicating a complex reaction mechanism that is explained by the biexponential fit equation as discussed in the manuscript. Similar observation was found for all the systems discussed in the manuscript.

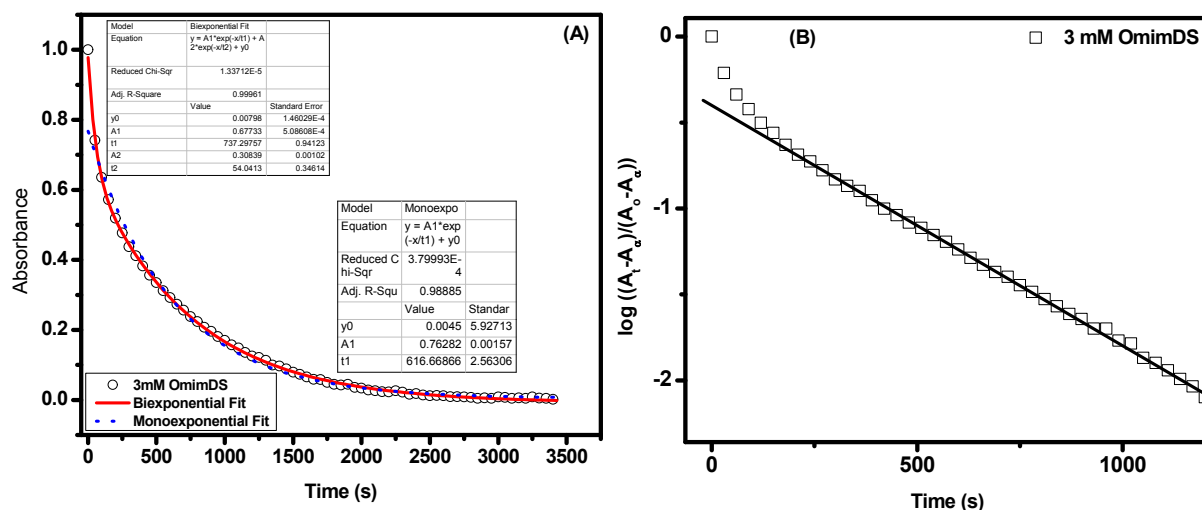

**Figure S2:** Plots of A) absorbance vs time, B)  $\ln((A_t - A_\infty)/(A_0 - A_\infty))$  vs time of 16-ArN<sub>2</sub><sup>+</sup> with TBHQ in 3 mM OmimDS at pH 5.5 and 25 °C. Here,  $A_t$ ,  $A_\infty$  and  $A_0$  are the absorbance values at time  $t$ , infinity and zero respectively. The plots show that the experimental data fits the biexponential kinetics and not monoexponential one.

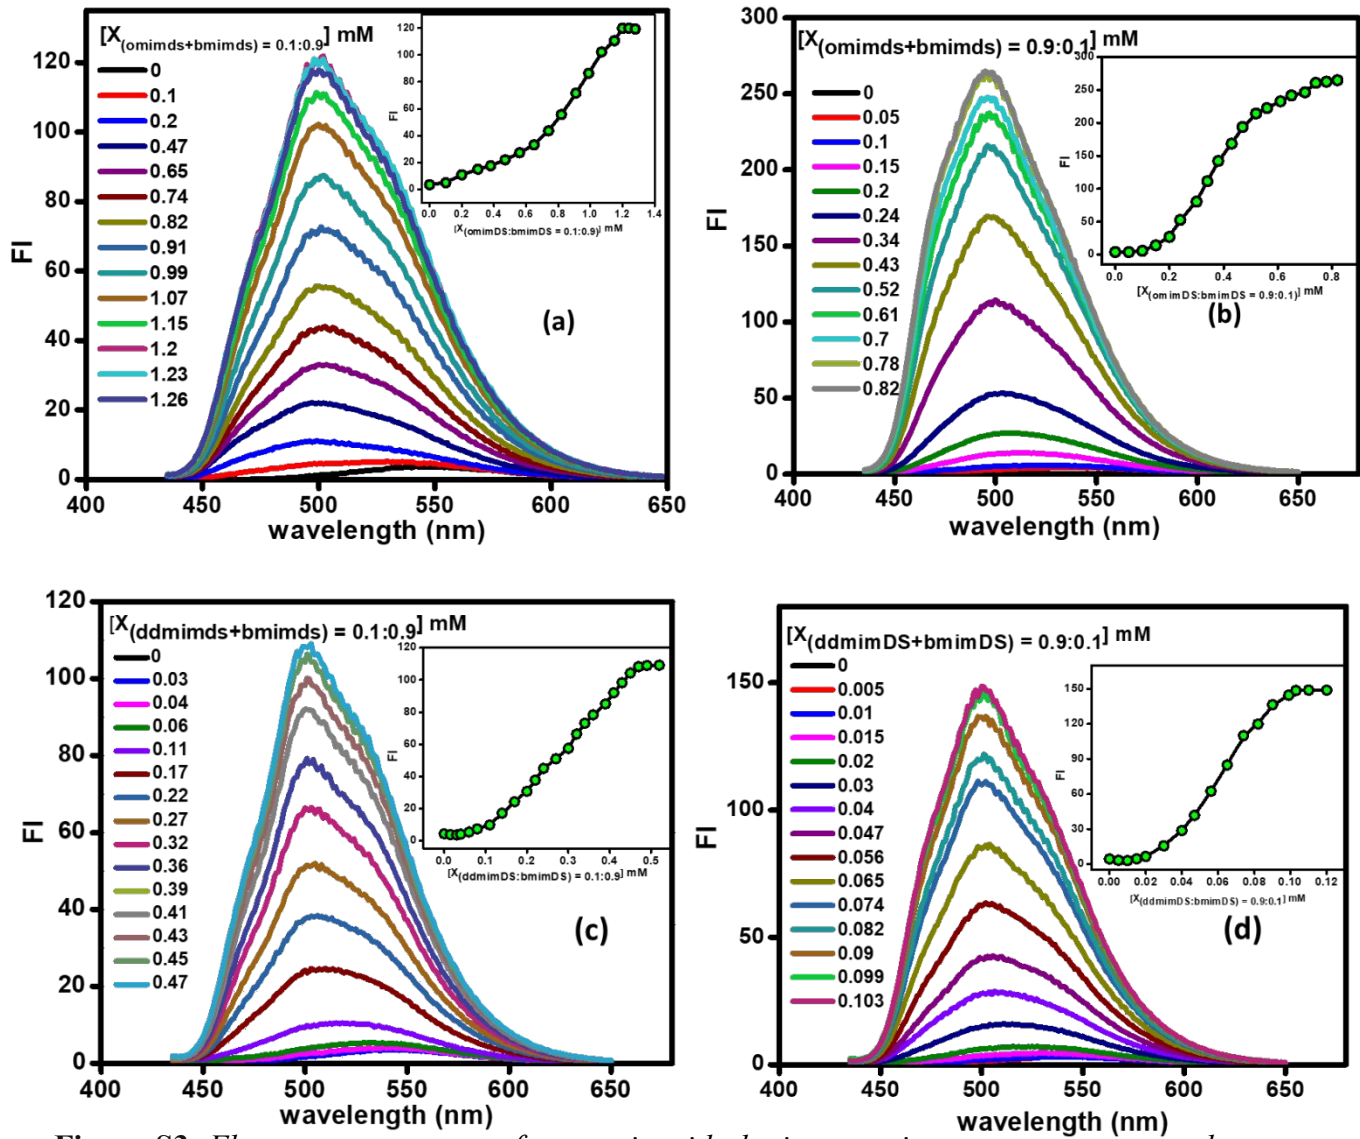

**Figure S3.** Fluorescence spectra of curcumin with the increase in the concentration of (a)  $X_{omimDS+bmimDS}$  (0.1:0.9) (b)  $X_{omimDS+bmimDS}$  (0.9:0.1) (c)  $X_{ddmimDS+bmimDS}$  (0.1:0.9) and (d)  $X_{ddmimDS+bmimDS}$  (0.9:0.1) (insets represent the change in fluorescence intensity as a function of surfactant concentration).
